# Supplementary material for: Transcriptional Regulation of Protein Synthesis by Mediator Kinase Represents a Therapeutic Vulnerability in MYC-driven Medulloblastoma
Source: PubMed Central journal article supplement (PMC11581124; doi:10.21203/rs.3.rs-5329081/v1), 2024-11-01
Supplement: NIHPPRS5329081V1-supplement-1.pdf [file NIHPPRS5329081V1-supplement-1.pdf]

## Supplementary Files

This is a list of supplementary files associated with this preprint. Click to download.

- [SupplementaryInformation.pdf](#)
